# Supplementary material
Source: publisher figshare collection journal article supplement (https://asha.figshare.com/articles/dataset/_/12735926)
Supplement: Supplementary file 1 [file 1]

## **Supplemental Material S1.**

### **Databases Searched**

Academic Search Premier, CINAHL, ERIC, Health Source: Nursing/Academic Edition, MEDLINE, Military & Government Collection, OpenDissertations, Psychology and Behavioral Sciences Collection, PsycINFO, Teacher Reference Center, Education Full Text (H.W. Wilson), Education Source, PubMed

### **Search Terms**

We checked the "Boolean/Phrase" check box. We only searched abstracts for first set of search terms. We did not place any limits on the remaining two sets of search terms.

#### **Full search terms**

autis\* OR ASD OR "Asperger Syndrome" OR "Pervasive Developmental Disorder\*-Not Otherwise Specified" OR "Pervasive Developmental Disorder\*" OR "Rett Syndrome" OR "Child\* degenerat\* Disorder" OR "Social (Pragmatic) Communication Disorder"

AND

interven\* OR treatment\* OR trial OR therap\* OR train\*

AND

Prosod\* OR "Speech Rate" OR "Speech Acoustics" OR "Voice Onset Time" OR "Intonation (Phonetics)" OR "Language rhythm" OR DE "Suprasegmentals" OR "Intonation" OR "Paralinguistics" OR "TONE (Phonetics)" OR "inflection" OR "speech characteristics"
